# Supplementary material for: High Protein Intake at Lunch Is Negatively Associated with Blood Pressure in Community-Dwelling Older Adults: A Cross-Sectional Study
Source: MDPI journal article supplement (doi:10.3390/nu15051251), 2023-03-02
Supplement: s1 [file s1]

**Table S1.** Adjusted Pearson's correlation (n=197).

|           | Protein, g   | Protein, g/kg | Protein at breakfast, g/kg | Protein at lunch, g/kg | Protein at dinner, g/kg |
|-----------|--------------|---------------|----------------------------|------------------------|-------------------------|
| SBP, mmHg | -0.11, 0.152 | -0.09, 0.203  | 0.05, 0.574                | <b>-0.19, 0.021</b>    | 0.06, 0.552             |
| DBP, mmHg | 0.07, 0.351  | 0.08, 0.256   | 0.03, 0.976                | 0.03, 0.940            | 0.01, 0.592             |
| HR, bpm   | -0.00, 0.952 | 0.00, 0.953   | -0.14, 0.082               | -0.05, 0.541           | 0.02, 0.718             |

Data are presented as Pearson's correlation (r), P-value. SBP= Systolic blood pressure; DBP= Diastolic blood pressure; HR= Heart rate; \*Adjusted for age, sex, and body mass index; Bold= P<0.05.

**Table S2.** Adjusted Pearson's correlation (n=197).

|           | Protein, g   | Protein, g/kg | Protein at breakfast, g/kg | Protein at lunch, g/kg | Protein at dinner, g/kg |
|-----------|--------------|---------------|----------------------------|------------------------|-------------------------|
| SBP, mmHg | -0.14, 0.152 | -0.14, 0.203  | 0.08, 0.291                | <b>-0.20, 0.009</b>    | 0.00, 0.933             |
| DBP, mmHg | 0.07, 0.351  | 0.09, 0.256   | 0.07, 0.369                | 0.02, 0.627            | -0.00, 0.897            |
| HR, bpm   | 0.04, 0.952  | 0.06, 0.953   | -0.08, 0.270               | -0.03, 0.557           | 0.04, 0.550             |

Data are presented as Pearson's correlation (r), P-value. SBP= Systolic blood pressure; DBP= Diastolic blood pressure; HR= Heart rate; \*Adjusted for age, sex, and body mass index, kilocalories, calcium, potassium, sodium, and magnesium; Bold= P<0.05.
